# Supplementary material for: Janus magnetoelastic membrane swimmers
Source: Royal Society of Chemistry journal article supplement (doi:10.1039/d3sm00788j), 2023-01-01
Supplement: d3sm00788j1.pdf [file d3sm00788j1.pdf]

Electronic Supplementary Information (ESI) for:

**Janus magnetoelastic membrane swimmers**

Yao Xiong,<sup>1</sup> Hang Yuan<sup>2</sup> and Monica Olvera de la Cruz<sup>1,3,4,5</sup>

<sup>1</sup> *Center for Computation & Theory of Soft Materials, Northwestern University, Evanston, IL, 60208, USA*

<sup>2</sup> *Applied Physics Graduate Program, Northwestern University, Evanston, IL, 60208, USA*

<sup>3</sup> *Department of Materials Science and Engineering, Northwestern University, Evanston, IL, 60208, USA*

<sup>4</sup> *Department of Chemistry, Northwestern University, Evanston, IL, 60208, USA*

<sup>5</sup> *Department of Physics and Astronomy, Northwestern University, Evanston, IL, 60208, USA*

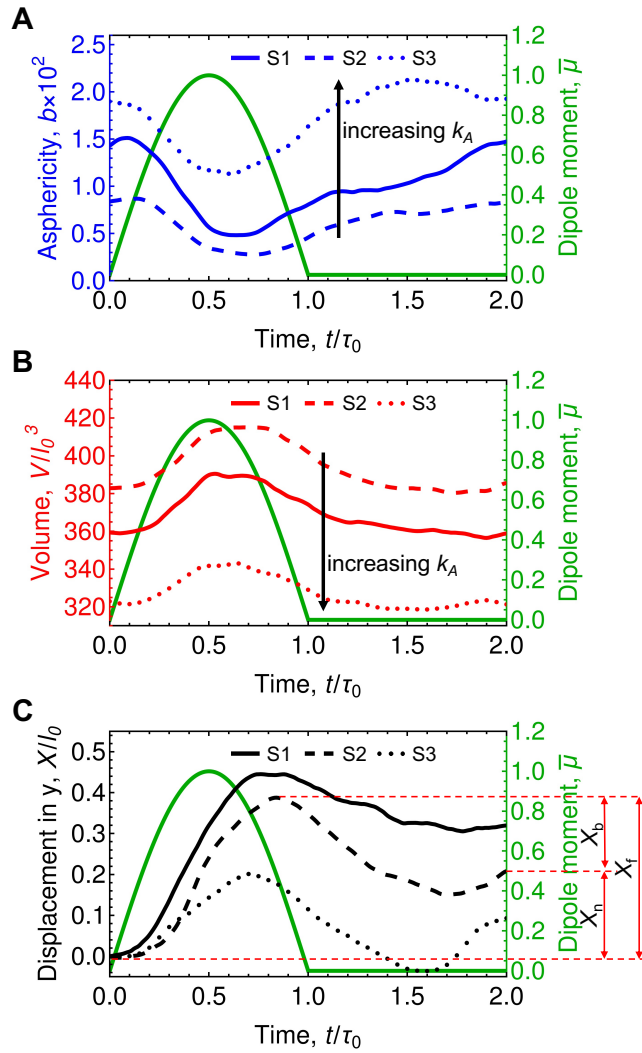

**Fig. S1** Time evolutions of (A) the asphericity  $b$ , (B) the volume  $V$ , and (C) the displacement in  $y$ -direction. The sample S1~S3 are the same as marked in Fig. 4A.

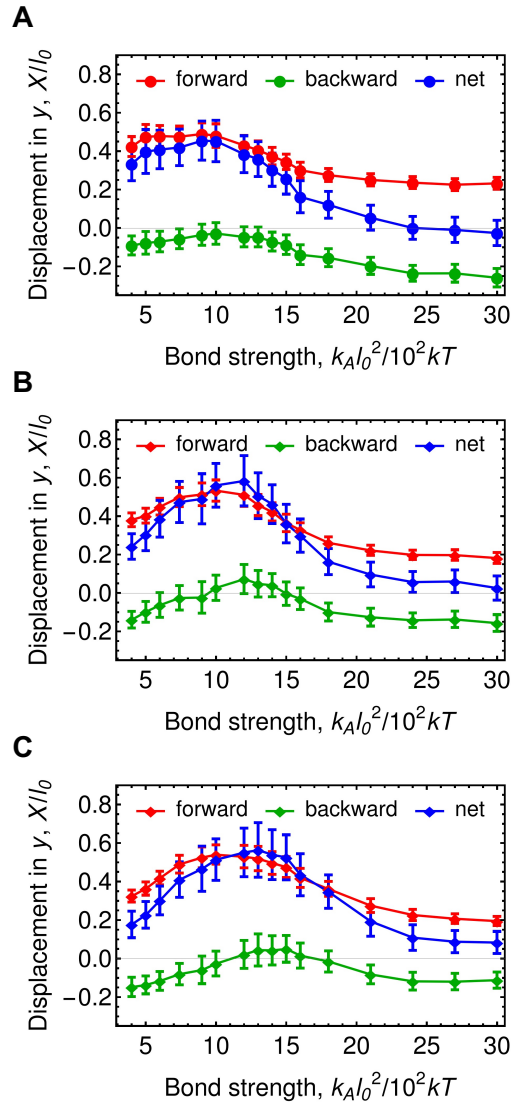

**Fig. S2** The averaged forward, backward, and net displacements of one period for samples of microscopic bending rigidity (A)  $\tilde{\kappa}_A = 10 \epsilon$ , (B)  $\tilde{\kappa}_A = 50 \epsilon$ , and (C)  $\tilde{\kappa}_A = 90 \epsilon$ . The samples are the same as shown in Fig. 4A. As schemed in Fig. S1C, a forward displacement,  $X_f$ , is defined as the maximum displacement during the first half of the period, and a backward displacement,  $X_b$ , is computed as the difference of the net displacement  $X_n$  with  $X_f$ .

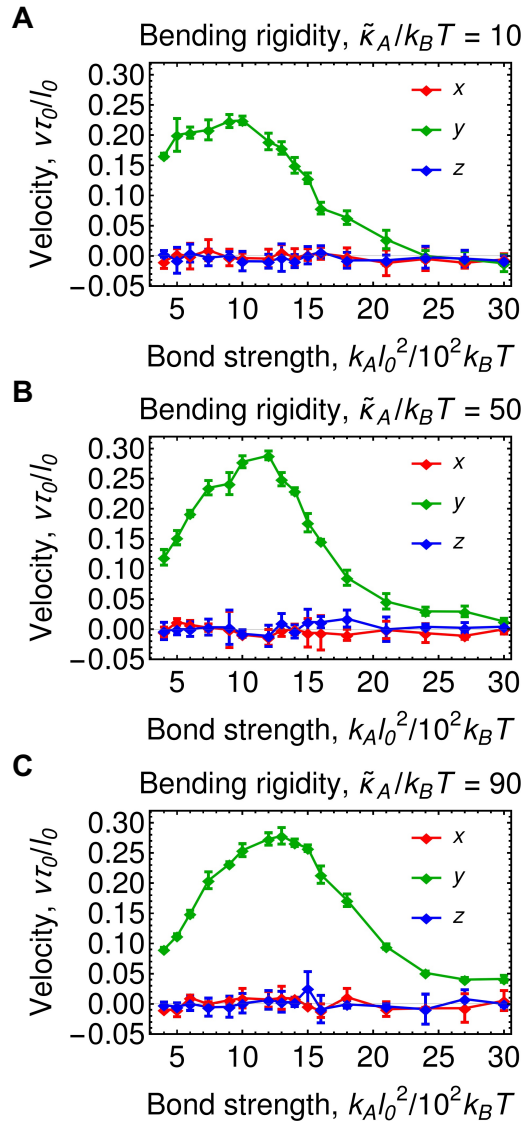

**Fig. S3** Effects of bond strength  $k_A$  on the propelling velocity for samples of microscopic bending rigidity (A)  $\tilde{\kappa}_A = 10 \epsilon$ , (B)  $\tilde{\kappa}_A = 50 \epsilon$ , and (C)  $\tilde{\kappa}_A = 90 \epsilon$ . The samples are the same as shown in Fig. 4A.
